# Supplementary figures and images for: Effect of Capsaicin and Other Thermo-TRP Agonists on Thermoregulatory Processes in the American Cockroach
Source: MDPI journal article supplement (doi:10.3390/molecules23123360), 2018-12-18

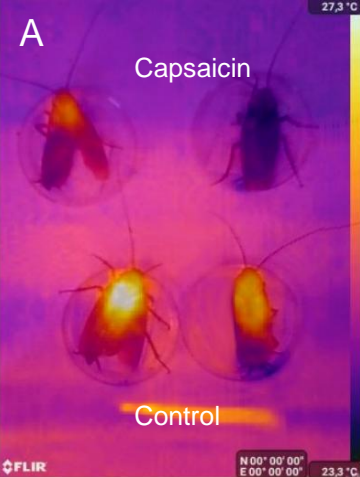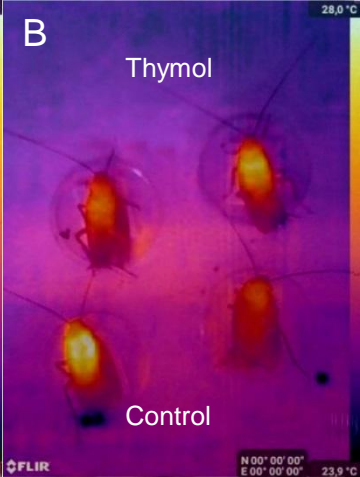

Supplement: s1 [file s1]
